# Supplementary material for: Outstanding performance of CuO/Fe–Ti spinel for Hg0 oxidation as a co-benefit of NO abatement: significant promotion of Hg0 oxidation by CuO loading
Source: Royal Society of Chemistry journal article supplement (doi:10.1039/d0cy02081h), 2021-01-01
Supplement: d0cy02081h1.pdf [file d0cy02081h1.pdf]

## Supporting Information

### **Outstanding performance of CuO/Fe-Ti spinel for Hg<sup>0</sup> oxidation as a co-benefit of NO abatement: Significant promotion of Hg<sup>0</sup> oxidation by CuO loading**

Pengxiang Sun, Jian Mei,\* Chang Wang, Zhen Ding, Qianqian Hong, Shijian Yang

*School of Environment and Civil Engineering, Jiangnan University, Wuxi, 214122, P. R. China*

Corresponding Author:

\* School of Environment and Civil Engineering, Jiangnan University. Telephone: 86-15121199536; E-mail: jsjhmj@126.com.

Content including: seven pages, one table, and four figures.

---

\* Corresponding author.

E-mail: jsjhmj@126.com (J. Mei).

## 1. Activity assessment system

As shown in Fig. S1, the assessment system for  $\text{Hg}^0$  oxidation mainly included four parts: a gas distribution system, a fixed-bed reaction system, a mercury detector, and an exhaust gas treatment system.

The gas distribution system consisted of different gas paths, which produced a simulated flue gas with  $90\ \mu\text{g m}^{-3}\ \text{Hg}^0$ , 10 ppm HCl, 5%  $\text{O}_2$ , chemical components (i.e., 8%  $\text{H}_2\text{O}$ , 500 ppm  $\text{SO}_2$ , 500 ppm  $\text{NH}_3$ , and 500 ppm NO when used), and  $\text{N}_2$  balance. The stable concentrations of  $\text{O}_2$ , HCl,  $\text{SO}_2$ , NO,  $\text{NH}_3$  and  $\text{N}_2$  were all provided by the gas cylinders, the stable  $\text{Hg}^0$  concentration was provided by a Hg permeation tube (provided by Green Calm Instruments of Suzhou, China), and the stable  $\text{H}_2\text{O}$  concentration was provided by the bubbling method. All the gas flows were controlled by the mass flowmeters. Gaseous  $\text{Hg}^0$ ,  $\text{O}_2$ , HCl,  $\text{SO}_2$ , NO and  $\text{N}_2$  balance were mixed by a gas mixer, which then was introduced into the fixed-bed reaction system. However,  $\text{NH}_3$  and  $\text{H}_2\text{O}$  was directly introduced into the fixed-bed reaction system to void the reaction with HCl, respectively.

The fixed-bed reaction system was mainly composed of a reaction furnace, a temperature controller with a thermocouple, and a quartz reaction tube. The simulated flue gas generated by the gas distribution system was introduced into the quartz reaction tube with an inner diameter of 6 mm, and its temperature was controlled by the reaction furnace with a temperature controller. Before each experiment, the prepared catalyst with 40-60 mesh was packed in the quartz reaction tube using silica wool.

The  $\text{Hg}^0$  concentration in the outlet was detected online by a cold vapor atomic adsorption spectrophotometer (Lumex R-915M).

The exhaust gas containing  $\text{Hg}^0$  was purified by activated carbons and then emitted into the air.

**Table S1** Percentages of Fe<sup>3+</sup> and Cu<sup>2+</sup> on Fe-Ti and CuO/Fe-Ti spinel resulted from the XPS analysis

|                  | /%               |                  |
|------------------|------------------|------------------|
|                  | Fe <sup>3+</sup> | Cu <sup>2+</sup> |
| Fe-Ti spinel     | 21.8             | -                |
| CuO/Fe-Ti spinel | 21.0             | 0.9              |

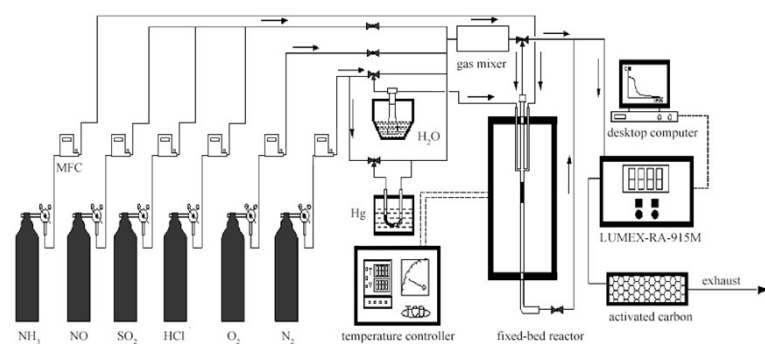

**Fig. S1** Flow diagram of the experimental setup for  $\text{Hg}^0$  oxidation.

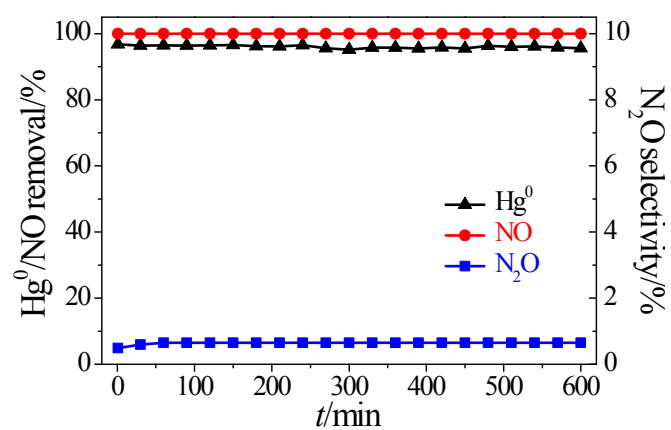

**Fig. S2** Hg<sup>0</sup> and NO removal efficiencies and N<sub>2</sub>O selectivity of CuO/Fe-Ti spinel under normal SCR conditions at 350 °C for 10 h. Operating conditions: catalyst weight = 500 mg and MHSV =  $6.0 \times 10^4$  cm<sup>3</sup> g<sup>-1</sup> h<sup>-1</sup>.

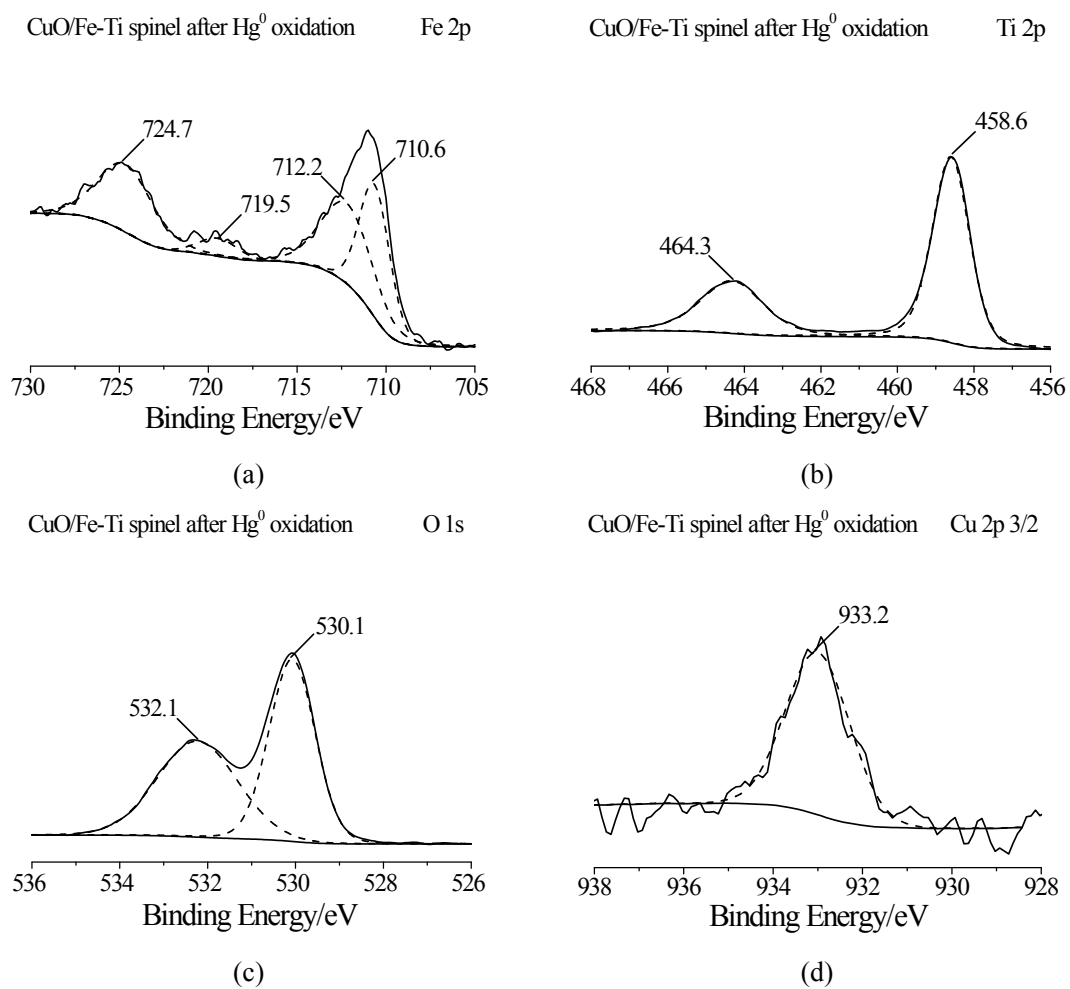

**Fig. S3** XPS spectra for CuO/Fe-Ti spinel after  $\text{Hg}^0$  oxidation in the Fe 2p, Ti 2p, O 1s, and Cu 2p $_{3/2}$  spectral regions.

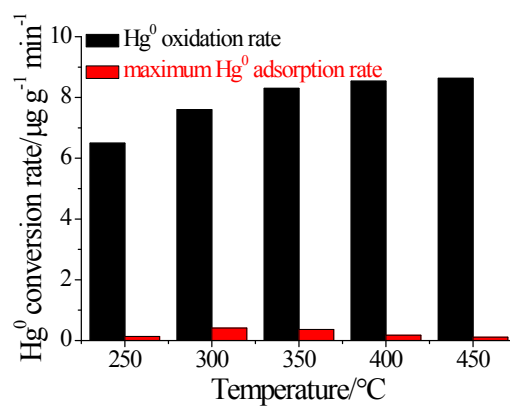

**Fig. S4** Rates of  $\text{Hg}^0$  oxidation and  $\text{Hg}^0$  adsorption on CuO/Fe-Ti spinel resulted from Fig. 8b.
